# Supplementary material for: Hitzeaktionspläne für Kliniken und Pflegeheime
Source: Springer Nature journal article supplement (doi:10.1007/s41906-021-1008-8), 2021-03-17
Supplement: MOESM1 [file 18978036]

## Literatur

### zum Beitrag „Hitzeaktionspläne für Kliniken und Pflegeheime“ von Beate Blättner, Henny Annette Grewe und Debora Janson

*PflegeZeitschrift* (74) 4/2021, S. 14-17

Bundesministerium für Umwelt, Naturschutz und nukleare Sicherheit (2020) Klimaanpassung in sozialen Einrichtungen. <https://www.bmu.de/themen/forschung-foerderung/foerderung/foerdermoeglichkeiten/details/klimaanpassung-in-sozialen-einrichtungen/> (Zugriff am 27.12.2020)

Bund/Länder Ad-hoc Arbeitsgruppe ‚Gesundheitliche Anpassung an die Folgen des Klimawandels‘ (2017) Handlungsempfehlungen für die Erstellung von Hitzeaktionsplänen zum Schutz der menschlichen Gesundheit, <https://www.bmu.de/themen/klima-energie/klimaschutz/anpassung-an-den-klimawandel/handlungsempfehlungen-fuer-die-erstellung-von-hitzeaktionsplaenen/> (Zugriff am 27.12.2020)

Eis D, Helm D, Laußmann D, Stark K (2010) Klimawandel und Gesundheit – Ein Sachstandsbericht. Robert Koch-Institut, Berlin, [http://www.rki.de/DE/Content/Gesund/Umwelteinfluesse/Klimawandel/Klimawandel-Gesundheit-Sachstandsbericht.pdf?\\_\\_blob=publicationFile](http://www.rki.de/DE/Content/Gesund/Umwelteinfluesse/Klimawandel/Klimawandel-Gesundheit-Sachstandsbericht.pdf?__blob=publicationFile) (Zugriff am 27.12.2020)

Landessanitätsdirektion Wien (2018) Leitfaden Hitzemaßnahmenplan. Für medizinische und pflegerische Einrichtungen zur Erstellung eigener Hitzemaßnahmenpläne. <https://www.wien.gv.at/gesundheitsandirektion/pdf/leitfadenhitzemassnahmenplan.pdf> (Zugriff am 27.12.2020)

LMU Klinikum (2020) Hitzemaßnahmenplan für stationäre Einrichtungen der Altenpflege. Empfehlungen aus der Praxis für die Praxis. <https://www.hcm-magazin.de/files/smfiledata/2/7/1/4/6/8/6/Hitzemassnahmenplan.pdf> (Zugriff am 27.12.2020)

Regierungspräsidium Gießen. Betreuungs- und Pflegeaufsicht Hessen (2018) Außergewöhnliche Hitzeperioden. Vorbereitung und Vorgehen in stationären Einrichtungen der Alten- und Behindertenhilfe. [https://rp-giessen.hessen.de/sites/rp-giessen.hessen.de/files/Brosch%c3%bcrc\\_Handlungsempfehlungen\\_Hitzeperioden\\_BF.pdf](https://rp-giessen.hessen.de/sites/rp-giessen.hessen.de/files/Brosch%c3%bcrc_Handlungsempfehlungen_Hitzeperioden_BF.pdf) (Zugriff am 27.12.2020)

WHO Europa - Weltgesundheitsorganisation Regionalbüro für Europa (2019) Gesundheitshinweise zur Prävention hitzebedingter Gesundheitsschäden: Neue und aktualisierte Hinweise für unterschiedliche Zielgruppen. WHO, Kopenhagen. <https://www.euro.who.int/de/health-topics/Life-stages/healthy-ageing/publications/2011/public-health-advice-on-preventing-health-effects-of-heat.-new-and-updated-information-for-different-audiences> (Zugriff am 27.12.2020)
